# Supplementary material for: Catalytic nano-rattle of Au@hollow silica: towards a poison-resistant nanocatalyst
Source: Royal Society of Chemistry journal article supplement (doi:10.1039/c0jm02012e), 2010-10-22
Supplement: c0jm02012e.pdf [file c0jm02012e.pdf]

## Electronic Supplementary Information (ESI)

# Catalytic nanorattle of Au@hollow silica: Towards a poison-resistant nanocatalyst

Si-Han Wu, Chih-Ta Tseng, Yu-Shen Lin, Cheng-Han Lin, Yann Hung and Chung-Yuan Mou\*

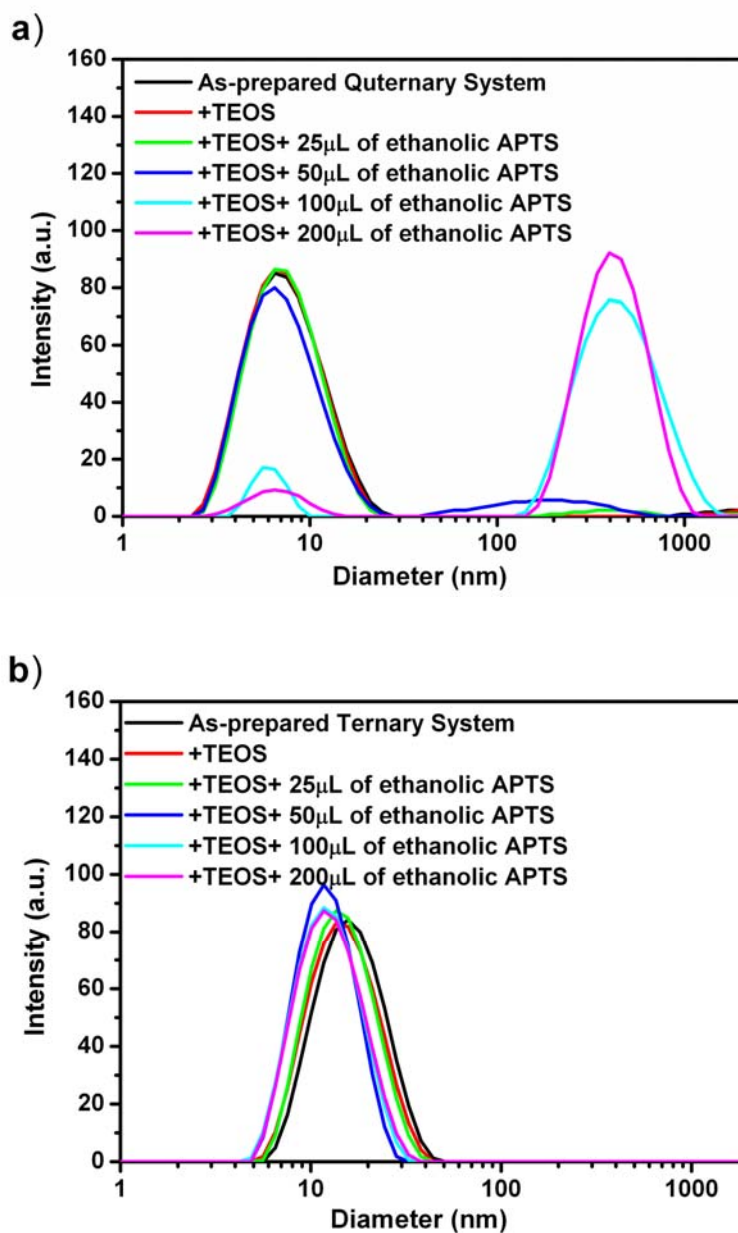

**Figure S1.** Room temperature hydrodynamic size distribution of micelles obtained from (a) quaternary w/o microemulsion (water, oil, surfactant, and co-surfactant) and (b) ternary w/o microemulsion (water, oil, and surfactant) in different conditions. The composition of the quaternary w/o microemulsion is described in ref. [23]).

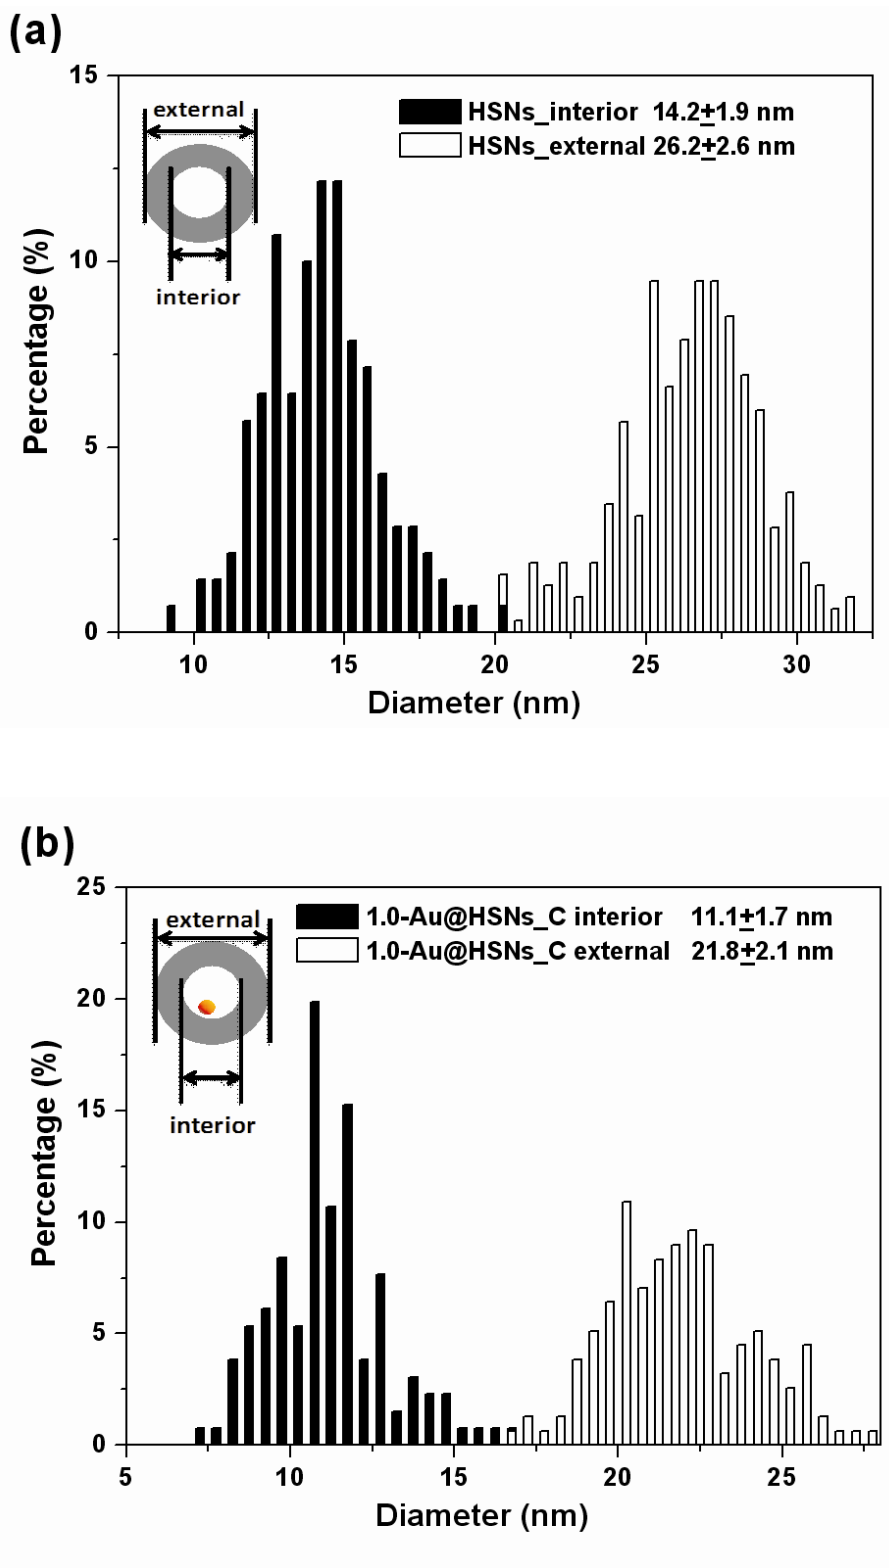

**Figure S2.** Size distribution histograms of interior and external diameter of (a) HSNs and (b) 1.0-Au@HSNs\_C.

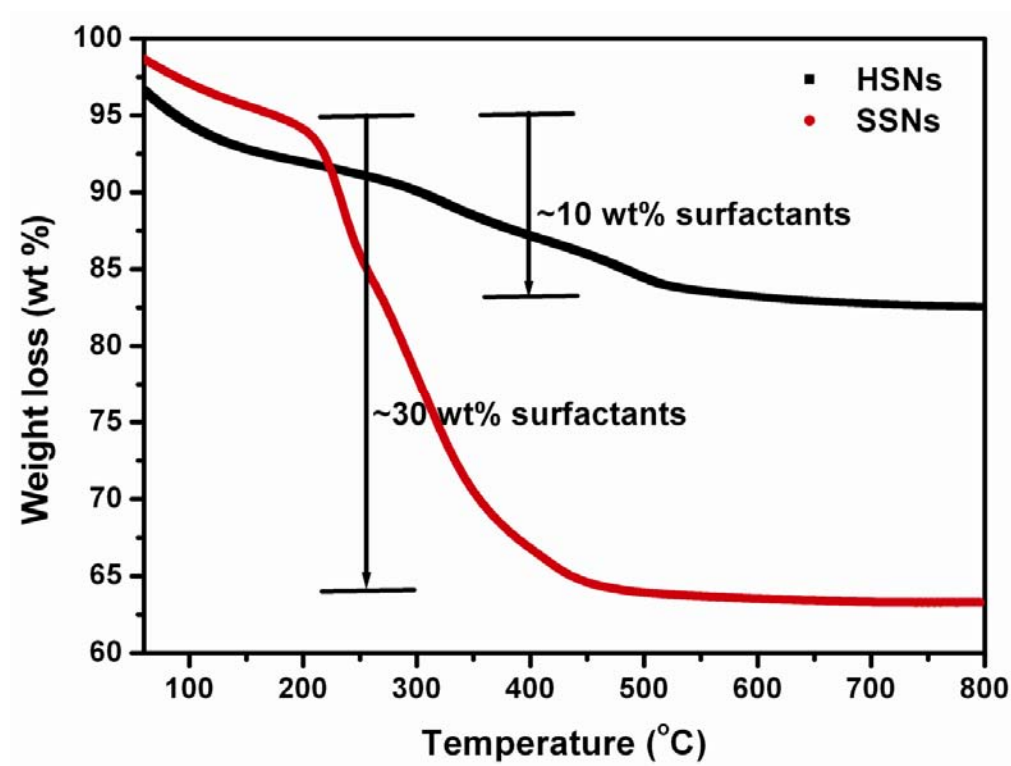

**Figure S3.** Weight loss profiles of as-synthesized SSNs without D.I. water washing and HSNs after D.I. water washing obtained from thermogravimetric analysis (TGA).

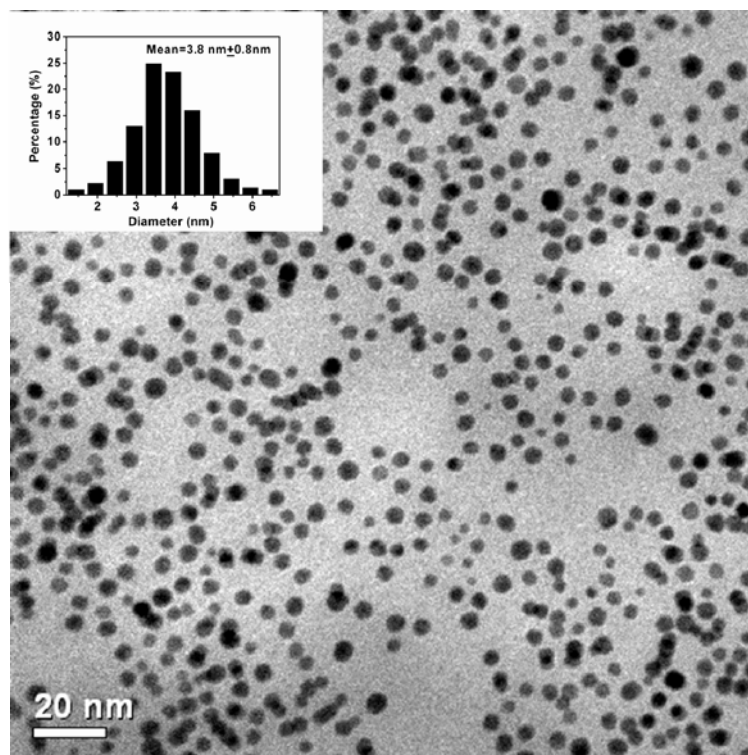

**Figure S4.** TEM image and size distribution histogram of Au@citrate nanoparticles.

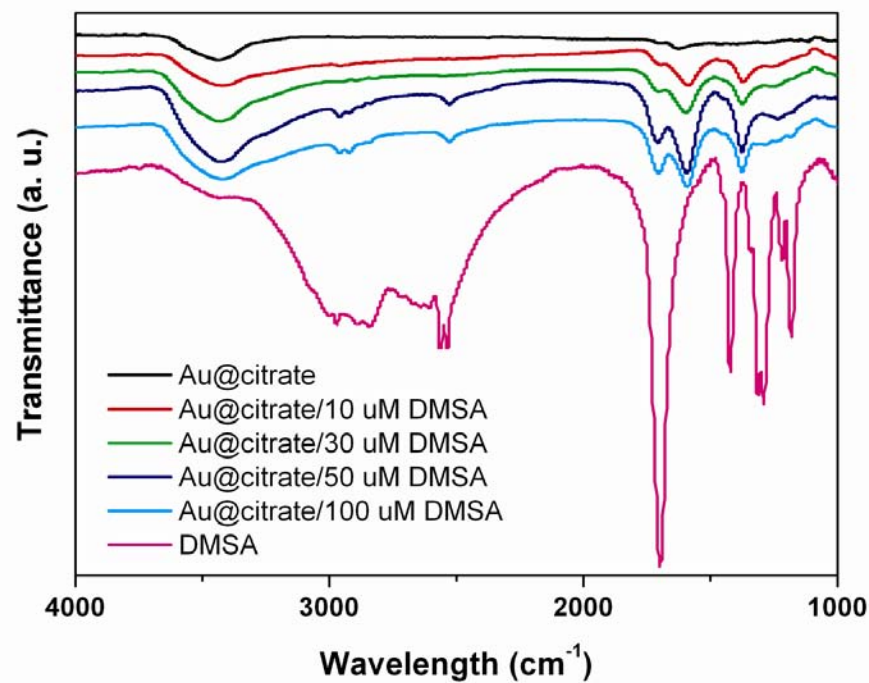

**Figure S5.** FT-IR spectra of Au@citrate nanoparticles in the presence of various amounts of DMSA. The peaks at 2540 and 2560  $\text{cm}^{-1}$  represent the S-H stretching vibration mode, that disappear below 30  $\mu\text{M}$  of DMSA, indicating the formation of Au-S bond. However, the peaks appear again at higher concentration of DMSA, above 50  $\mu\text{M}$ , implying there are free DMSA in addition to those bound to gold surface.

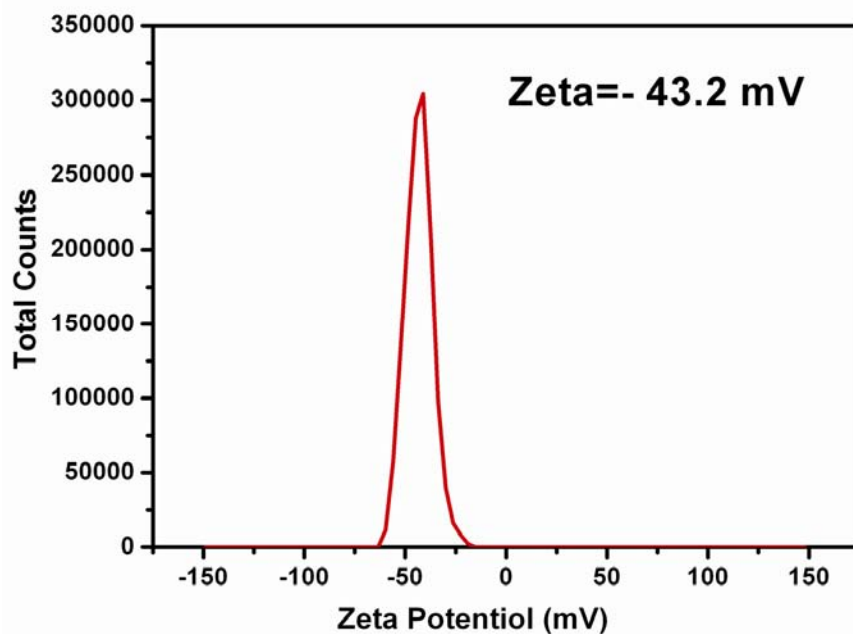

**Figure S6.** Zeta potential distribution of 1.0-Au@HSNs\_C suspended in aqueous sodium hydroxide solution (pH=10).
